# Supplementary material
Source: publisher figshare collection journal article supplement (https://tandf.figshare.com/ndownloader/files/33986333)
Supplement: Supplementary file 1 [file 33986333]

**Supplemental Table S1**

**Relative concentration (%) of volatile compounds of BJV**

| **Volatile Compound** | **CAS** | **Fermentation Time (d)** | | | | | | | | | |
| --- | --- | --- | --- | --- | --- | --- | --- | --- | --- | --- | --- |
| 1 | 3 | 5 | 7 | 9 | 11 | 13 | 15 | 17 | 19 |
| **Acids** |  |  |  |  |  |  |  |  |  |  |  |
| Acetic acid | 64-19-7 | - | 18.27 | 26.59 | 31.27 | 22.57 | 42.57 | 38.62 | 65.88 | 62.04 | 72.06 |
| Isovaleric acid | 503-74-2 | - | - | - | 0.14 | 0.20 | 0.21 | 0.22 | 0.28 | 0.32 | 0.40 |
| Octanoic acid | 124-07-2 | 1.01 | 1.23 | 0.43 | 0.46 | 0.32 | 0.21 | 0.17 | 0.19 | 0.17 | 0.18 |
| Decanoic acid | 334-48-5 | 4.82 | 4.55 | - | - | - | - | - | 0.18 | 0.23 | 0.16 |
| Heptanoic acid | 111-14-8 | 0.44 | 0.17 | 0.00 | 0.07 | 0.07 | 0.06 | 0.04 | 0.03 | 0.03 | 0.04 |
| Lauric acid | 143-07-7 | 3.46 | 1.23 | 0.65 | 0.84 | 0.25 | 0.18 | - | - | - | - |
| Hexanoic acid | 142-62-1 | 0.57 | 0.64 | 0.27 | 0.07 | - | - | - | - | - | - |
| Isobutyric acid | 79-31-2 | - | - | - | - | 0.03 | 0.03 | 0.05 | 0.06 | 0.07 | 0.07 |
| **Esters** |  |  |  |  |  |  |  |  |  |  |  |
| Ethyl caprate | 110-38-3 | 3.93 | 0.88 | 1.38 | 1.29 | 0.83 | 0.58 | 0.15 | 0.14 | 0.06 | - |
| Ethyl dodecanoate | 106-33-2 | 4.52 | 1.48 | 4.08 | 2.77 | 1.37 | 1.49 | 2.35 | 1.57 | 1.63 | 1.75 |
| Ethyl 3-phenylpropionate | 2021-28-5 | 0.88 | 0.46 | 0.49 | 0.57 | 0.44 | 0.36 | 0.27 | 0.23 | 0.27 | 0.16 |
| Ethyl myristate | 124-06-1 | 1.04 | 0.59 | 0.73 | 0.34 | 0.14 | 0.26 | 0.06 | - | - | - |
| Ethyl acetate | 141-78-6 | - | 27.98 | 31.71 | 21.83 | 19.73 | 17.36 | 32.09 | 11.59 | 12.52 | 7.35 |
| Ethyl nonanoate | 123-29-5 | - | 0.05 | 0.12 | 0.09 | 0.08 | 0.06 | - | - | - | - |
| 9-Hexadecenoic acid,ethyl ester | 54546-22-4 | 0.96 | - | 0.89 | 0.40 | 0.19 | 0.47 | 0.15 | 0.07 | - | - |
| Ethyl caproate | 123-66-0 | - | - | - | 0.07 | 0.18 | 0.24 | 0.08 | 1.32 | 0.89 | 2.25 |
| Ethyl caprylate | 106-32-1 | - | - | - | 0.47 | 0.39 | 0.20 | 0.06 | - | - | - |
| Isobutyl acetate | 110-19-0 | - | - | - | - | 0.17 | - | 0.57 | 0.81 | 2.18 | 1.48 |
| Isoamyl acetate | 123-92-2 | - | - | 0.13 | - | 0.17 | 2.58 | 3.02 | 2.51 | 2.41 | 0.96 |
| Phenethyl acetate | 103-45-7 | - | - | - | 0.15 | 0.29 | 0.58 | 0.91 | 1.07 | 1.36 | 1.18 |
| Ethyl palmitate | 628-97-7 | - | - | - | 0.13 | - | 0.23 | 0.83 | 0.67 | 1.12 | 1.08 |
| Benzyl acetate | 140-11-4 | - | - | - | - | - | 0.13 | 0.22 | 0.57 | 1.37 | 1.88 |
| Ethyl phenylacetate | 101-97-3 | - | - | - | - | - | - | - | - | 0.03 | 1.02 |
| **Aldehydes** |  |  |  |  |  |  |  |  |  |  |  |
| 3-Furaldehyde | 498-60-2 | 16.94 | 1.02 | 0.24 | - | - | - | - | - | - | - |
| 5-Methyl furfural | 620-02-0 | 3.65 | 0.33 | - | - | - | - | - | - | - | - |
| Benzaldehyde | 100-52-7 | 1.64 | 1.16 | 0.56 | 0.61 | 1.07 | 0.53 | 0.35 | 0.24 | 0.33 | 0.41 |
| **Alcohols** |  |  |  |  |  |  |  |  |  |  |  |
| Ethanol | 64-17-5 | 55.73 | 38.33 | 29.76 | 31.28 | 38.39 | 19.64 | 10.60 | 4.18 | 5.13 | 1.57 |
| Isooctanol | 104-76-7 | - | 1.02 | 0.37 | 0.35 | 0.33 | 0.19 | 0.23 | 0.18 | 0.11 | 0.12 |
| 3-Methyl-1-butanol | 123-51-3 | - | - | 0.95 | 3.85 | 9.62 | 8.10 | 5.77 | 4.41 | 4.62 | 3.08 |
| 1-heptanol | 111-70-6 | - | - | 0.12 | 0.11 | 0.08 | 0.04 | 0.03 | 0.01 | - | 0.01 |
| 2-Methyl-1-propanol | 78-83-1 | - | - | - | 0.55 | 0.38 | 0.60 | 0.42 | 0.39 | 0.34 | 0.27 |
| Phenethyl alcohol | 1960-12-8 | - | - | - | 2.09 | 2.42 | 2.59 | 2.01 | 2.27 | 1.92 | 1.86 |
| Benzyl alcohol | 100-51-6 | - | - | - | - | - | 0.46 | 0.40 | 0.52 | 0.57 | 0.45 |
| **Ketones** |  |  |  |  |  |  |  |  |  |  |  |
| 6-Methyl-5-hepten-2-one | 110-93-0 | 0.41 | 0.37 | - | - | - | - | - | - | - | - |
| 3-Hydroxy-2-butanone | 513-86-0 | - | - | 0.41 | 0.20 | 0.06 | 0.05 | 0.08 | 0.11 | 0.10 | 0.14 |
| **Others** |  |  |  |  |  |  |  |  |  |  |  |
| 2,5-di-tert-butylphenol | 5875-45-6 | - | 0.11 | 0.04 | 0.00 | 0.15 | - | 0.13 | 0.37 | 0.12 | - |
| 2-Acetylfuran | 1192-62-7 | 0.00 | 0.13 | 0.08 | - | 0.08 | - | 0.03 | 0.06 | 0.02 | - |
| Naphthalene | 91-20-3 | - | - | - | - | - | - | 0.06 | - | - | - |
| isopropenyl benzene | 98-83-9 | - | - | - | - | - | - | 0.03 | 0.09 | 0.04 | 0.07 |

**Supplemental Table S2**

**Relative concentration (%) of volatile compounds of RJV**

| **Volatile Compound** | **CAS** | **Fermentation Time (d)** | | | | | | | | | |
| --- | --- | --- | --- | --- | --- | --- | --- | --- | --- | --- | --- |
| 1 | 3 | 5 | 7 | 9 | 11 | 13 | 15 | 17 | 19 |
| **Acids** |  |  |  |  |  |  |  |  |  |  |  |
| Acetic acid | 64-19-7 | - | 32.21 | 17.28 | 25.87 | 28.54 | 36.57 | 44.29 | 67.24 | 82.01 | 79.85 |
| Valeric acid | 109-52-4 | 0.34 | 0.14 | 0.11 | 0.10 | 0.08 | 0.06 | 0.06 | 0.06 | - | - |
| Octanoic acid | 124-07-2 | 1.73 | 0.91 | 1.15 | 1.12 | 0.97 | 0.78 | - | 0.88 | 0.82 | 0.63 |
| Decanoic acid | 334-48-5 | 1.05 | 0.50 | 0.45 | 0.43 | 0.40 | 0.41 | 0.51 | 0.28 | 0.29 | 0.20 |
| Heptanoic acid | 111-14-8 | 1.40 | 0.68 | 0.84 | 0.71 | 0.61 | 0.47 | 0.51 | 0.43 | 0.43 | 0.35 |
| Lauric acid | 143-07-7 | - | - | - | - | - | - | 0.11 | 0.08 | 0.09 | 0.12 |
| Hexanoic acid | 142-62-1 | 2.14 | 1.63 | 1.27 | 1.10 | - | - | - | - | - | - |
| Nonanoic acid | 112-05-0 | 0.16 | 0.14 | 0.09 | 0.09 | 0.11 | 0.07 | - | - | - | - |
| **Esters** |  |  |  |  |  |  |  |  |  |  |  |
| Ethyl caprate | 110-38-3 | 1.34 | 0.32 | 0.45 | 0.20 | 0.18 | 0.29 | 0.69 | 1.29 | 1.34 | 1.54 |
| Ethyl dodecanoate | 106-33-2 | 2.51 | 0.29 | 0.73 | 0.11 | 0.14 | 0.11 | 0.42 | 1.08 | 0.89 | 2.16 |
| Ethyl acetate | 141-78-6 | - | 6.49 | 19.87 | 31.15 | 28.90 | 14.96 | 26.51 | 10.41 | 1.51 | 1.99 |
| Ethyl caprylate | 106-32-1 | 0.82 | 0.25 | 0.36 | 0.39 | 0.31 | 0.43 | 0.40 | 0.62 | 0.89 | 1.02 |
| Isobutyl acetate | 110-19-0 | - | - | - | - | - | - | - | - | 0.16 | 0.12 |
| Isoamyl acetate | 123-92-2 | - | - | - | 0.13 | 0.33 | 0.53 | 0.50 | 0.65 | 1.26 | 0.91 |
| Ethyl palmitate | 628-97-7 | - | - | - | - | 0.06 | 0.09 | 0.15 | 0.27 | 0.13 | 0.33 |
| Phenethyl acetate | 103-45-7 | - | - | - | - | - | - | 0.07 | 0.11 | 0.12 | 0.16 |
| Ethyl benzoate | 93-89-0 | 5.10 | 1.79 | 1.14 | 0.55 | 0.46 | 0.44 | 0.83 | 0.47 | 0.79 | 0.55 |
| Ethyl heptanoate | 106-30-9 | 0.86 | 0.18 | 0.19 | 0.11 | 0.14 | 0.12 | 0.52 | 0.28 | 0.22 | 0.30 |
| Ethyl butyrate | 105-54-4 | 0.71 | 0.18 | - | - | - | - | - | - | - | - |
| Ethyl valerate | 539-82-2 | 3.20 | 0.96 | 0.84 | 0.44 | 0.28 | 0.28 | 0.22 | 0.21 | - | 0.20 |
| **Aldehydes** |  |  |  |  |  |  |  |  |  |  |  |
| Benzaldehyde | 100-52-7 | 0.16 | 0.21 | 0.35 | 0.33 | 0.32 | 0.23 | 0.37 | 0.53 | 0.44 | 0.42 |
| Phenylacetaldehyde | 122-78-1 | - | - | - | - | 0.15 | 0.38 | 0.89 | 1.23 | 1.61 | 1.49 |
| **Alcohols** |  |  |  |  |  |  |  |  |  |  |  |
| Ethanol | 64-17-5 | 77.80 | 52.76 | 52.58 | 33.47 | 32.57 | 37.64 | 16.55 | 7.27 | 1.17 | 2.37 |
| 3-Methyl-1-butanol | 123-51-3 | - | - | 0.05 | 0.23 | 0.45 | 0.68 | 0.78 | 0.82 | 1.11 | 1.04 |
| DL-Menthol | 15356-70-4 | 0.26 | 0.13 | 0.11 | 0.09 | 0.08 | 0.06 | 0.09 | 0.07 | 0.07 | 0.08 |
| Linalool | 78-70-6 | - | - | 0.06 | 0.10 | 0.10 | 0.11 | 0.14 | 0.09 | 0.13 | 0.15 |
| Benzyl alcohol | 100-51-6 | 0.42 | 0.23 | 1.42 | 0.94 | 0.83 | 0.87 | 0.78 | 0.86 | 0.71 | 0.63 |
| **Ketones** |  |  |  |  |  |  |  |  |  |  |  |
| 3-Hydroxy-2-butanone | 513-86-0 | - | - | 0.66 | 2.34 | 3.99 | 4.42 | 4.61 | 4.77 | 3.81 | 3.39 |

**Supplemental Table S3**

**Significance analysis of relative content of volatile components in BJV before, middle and late fermentation**

| **Volatile Compound** | **CAS** | **Fermentation Time (d)** | | |
| --- | --- | --- | --- | --- |
| **Acids** |  | 1 | 11 | 19 |
| Aceticacid | 64-19-7 | 0c | 42.57±5.82b | 72.06±4.34a |
| Isovaleric acid | 503-74-2 | 0c | 0.21±0.13ab | 0.4±0.13a |
| Octanoic acid | 124-07-2 | 1.01±0.18a | 0.21±0.05b | 0.18±0.04b |
| Decanoic acid | 334-48-5 | 4.82±0.45a | 0b | 0.16±0.03b |
| Heptanoic acid | 111-14-8 | 0.44±0.13a | 0.06±0.03b | 0.04±0.03b |
| Lauric acid | 143-07-7 | 3.46±0.13a | 0.18±0.09b | 0c |
| Hexanoic acid | 142-62-1 | 0.57±0.1a | 0b | 0b |
| Isobutyric acid | 79-31-2 | 0a | 0.03±0.03a | 0.07±0.05a |
| **Esters** |  |  |  |  |
| Ethyl caprate | 110-38-3 | 3.93±0.34a | 0.58±0.1b | 0c |
| Ethyl dodecanoate | 106-33-2 | 4.52±0.22a | 1.49±0.16b | 1.75±0.04b |
| Ethyl 3-phenylpropionate | 2021-28-5 | 0.88±0.21a | 0.36±0.04b | 0.16±0.06b |
| Ethyl myristate | 124-06-1 | 1.04±0.46a | 0.26±0.08b | 0b |
| Ethyl acetate | 141-78-6 | 0c | 17.36±3.57a | 7.35±0.93b |
| Ethyl nonanoate | 123-29-5 | 0b | 0.06±0.03a | 0b |
| 9-Hexadecenoic acid,ethyl ester | 54546-22-4 | 0.96±0.25a | 0.47±0.04b | 0c |
| Ethyl caproate | 123-66-0 | 0c | 0.24±0.01b | 2.25±0.17a |
| Ethyl caprylate | 106-32-1 | 0.00b | 0.2±0.06a | 0b |
| Isobutyl acetate | 110-19-0 | 0b | 0b | 1.48±0.24a |
| Isoamyl acetate | 123-92-2 | 0c | 2.58±0.12a | 0.96±0.09b |
| Phenethyl acetate | 103-45-7 | 0c | 0.58±0.11b | 1.18±0.31a |
| Ethyl palmitate | 628-97-7 | 0a | 0.23±0.08a | 1.08±0.9a |
| Benzyl acetate | 140-11-4 | 0c | 0.13±0.06b | 1.88±0.09a |
| Ethyl phenylacetate | 101-97-3 | 0b | 0b | 1.02±0.18a |
| **Aldehydes** |  |  |  |  |
| 3-Furaldehyde | 498-60-2 | 16.94±3.86a | 0b | 0b |
| 5-Methyl furfural | 620-02-0 | 3.65±0.35a | 0b | 0b |
| Benzaldehyde | 100-52-7 | 6.67±7.14a | 0.53±0.05a | 0.41±0.07a |
| **Alcohols** |  |  |  |  |
| Ethanol | 64-17-5 | 55.73±6.41a | 19.64±1.56b | 1.57±0.31c |
| Isooctanol | 104-76-7 | 0c | 0.19±0.02a | 0.12±0.04b |
| 3-Methyl-1-butanol | 123-51-3 | 0c | 8.1±0.7a | 3.08±0.24b |
| 1-heptanol | 111-70-6 | 0a | 0.04±0.04a | 0.01±0a |
| 2-Methyl-1-propanol | 78-83-1 | 0c | 0.6±0.05a | 0.27±0.09b |
| Phenethyl alcohol | 1960/12/8 | 0c | 2.59±0.48a | 1.86±0.10b |
| Benzyl alcohol | 100-51-6 | 0b | 0.46±0.09a | 0.45±0.03a |
| **Ketones** |  |  |  |  |
| 6-Methyl-5-hepten-2-one | 110-93-0 | 0.41±0.06a | 0b | 0b |
| 3-Hydroxy-2-butanone | 513-86-0 | 0b | 0.05±0.03b | 0.14±0.07a |
| **O**thers |  |  |  |  |
| 2,5-di-tert-butylphenol | 5875-45-6 | - | - | - |
| 2-Acetylfuran | 1192-62-7 | - | - | - |
| Naphthalene | 91-20-3 | - | - | - |
| isopropenyl benzene | 98-83-9 | 0b | 0b | 0.07±0.03a |

**Note:** Data are showed as mean ± standard error values (n=3). Different letters in each column represent significant differences (*p* < 0.05)

**Supplemental Table S4**

**Significance analysis of relative content of volatile components in RJV before, middle and late fermentation**

| **Volatile Compound** | **CAS** | **Fermentation Time (d)** | | |
| --- | --- | --- | --- | --- |
| **Acids** |  | 1 | 11 | 19 |
| Acetic acid | 64-19-7 | 0c | 36.57±2.72b | 79.85±3.00a |
| Valeric acid | 109-52-4 | 0.34±0.11a | 0.06±0.01b | 0.00.00b |
| Octanoic acid | 124-07-2 | 1.73±0.13a | 0.78±0.14b | 0.63±0.06b |
| Decanoic acid | 334-48-5 | 1.05±0.14a | 0.41±0.01b | 0.2±0.02c |
| Heptanoic acid | 111-14-8 | 1.4±0.17a | 0.47±0.03b | 0.35±0.03b |
| Lauric acid | 143-07-7 | 0a | 0b | 0.12±0.04b |
| Hexanoic acid | 142-62-1 | 2.14±0.06a | 0b | 0b |
| Nonanoic acid | 112-05-0 | 0.16±0.02a | 0.07±0.02b | 0c |
| **Esters** |  |  |  |  |
| Ethyl caprate | 110-38-3 | 1.34±0.11a | 0.29±0.05b | 1.54±0.33c |
| Ethyl dodecanoate | 106-33-2 | 2.51±0.16a | 0.11±0.04b | 2.16±0.12a |
| Ethyl acetate | 141-78-6 | 0c | 14.96±0.62a | 1.99±0.12b |
| Ethyl caprylate | 106-32-1 | 0.82±0.15a | 0.43±0.01b | 1.02±0.14a |
| Isobutyl acetate | 110-19-0 | 0b | 0b | 0.12±0.03a |
| Isoamyl acetate | 123-92-2 | 0c | 0.53±0.06b | 0.91±0.07a |
| Ethyl palmitate | 628-97-7 | 0c | 0.09±0.04b | 0.33±0.05a |
| Phenethyl acetate | 103-45-7 | 0b | 0b | 0.16±0.02a |
| Ethyl benzoate | 93-89-0 | 5.1±0.03a | 0.44±0.02c | 0.55±0.09b |
| Ethyl heptanoate | 106-30-9 | 0.86±0.11a | 0.12±0.02c | 0.3±0.03b |
| Ethyl butyrate | 105-54-4 | 0.71±0.15a | 0b | 0b |
| Ethyl valerate | 539-82-2 | 3.2±0.14a | 0.28±0.01b | 0.2±0.17b |
| **Aldehydes** |  |  |  |  |
| Benzaldehyde | 100-52-7 | 0.16±0.07b | 0.23±0.02b | 0.42±0.04a |
| Phenylacetaldehyde | 122-78-1 | 0c | 0.38±0.05c | 1.49±0.06a |
| **Alcohols** |  |  |  |  |
| Ethanol | 64-17-5 | 77.8±8.21a | 37.64±2.94b | 2.37±0.29c |
| 3-Methyl-1-butanol | 123-51-3 | 0c | 0.68±0.03b | 1.04±0.19a |
| DL-Menthol | 15356-70-4 | 0.26±0.05a | 0.06±0.03b | 0.08±0.02b |
| Linalool | 78-70-6 | 0c | 0.11±0b | 0.15±0.03a |
| Benzyl alcohol | 100-51-6 | 0.42±0.03c | 0.87±0.08a | 0.63±0.08b |
| **Ketones** |  |  |  |  |
| 3-Hydroxy-2-butanone | 513-86-0 | 0c | 4.42±0.17a | 3.39±0.12b |

**Note:** Data are showed as mean ± standard error values (n=3). Different letters in each column represent significant differences (*p* < 0.05)
